# Supplementary material for: Evaluation of β-Lactamase Enzyme Activity in Outer Membrane Vesicles (OMVs) Isolated from Extended Spectrum β-Lactamase (ESBL) Salmonella Infantis Strains
Source: MDPI journal article supplement (doi:10.3390/antibiotics12040744), 2023-04-13
Supplement: s1 [file s1]

TABLE S1.  $\beta$ -lactamase enzymes values (mU/mg) in OMVs concentrate, eluted and 0.45  $\mu$ m filtrate

| Strains | $\beta$ -lactamase activity (mU/mg) |                     |                       |
|---------|-------------------------------------|---------------------|-----------------------|
|         | OMVs concentrate                    | Eluted              | Filtrate 0.45 $\mu$ m |
| 1       | 355,45 $\pm$ 156,06                 | 346,30 $\pm$ 33,71  | 175,77 $\pm$ 156,06   |
| 2       | 372,48 $\pm$ 6,00                   | 118,70 $\pm$ 38,77  | 121,51 $\pm$ 6,00     |
| 3       | 507,88 $\pm$ 98,04                  | 346,30 $\pm$ 139,38 | 365,66 $\pm$ 98,04    |
| 4       | 336,47 $\pm$ 145,94                 | 297,69 $\pm$ 306,67 | 242,61 $\pm$ 145,94   |
| 5       | 1359,26 $\pm$ 167,39                | 289,34 $\pm$ 163,52 | 263,59 $\pm$ 167,39   |
